# Supplementary material for: Metformin and Cancer Risk and Mortality: A Systematic Review and Meta-analysis Taking into Account Biases and Confounders
Source: Oxford University Press journal article supplement (doi:10.1158/1940-6207.capr-13-0424), 2014-07-02
Supplement: 19406207capr130424-sup-123817_2_supp_2466726_n5bqh3.doc [file 19406207capr130424-sup-123817_2_supp_2466726_n5bqh3.doc]

| **Supplemental Table 2. Epidemiological studies of metformin and cancer risk with BMI adjustment.** | | | | | | | |
| --- | --- | --- | --- | --- | --- | --- | --- |
| **First Author, ref**  **year (Country)** | **Study design** | **Endpoint** | **Sample size** | **Adjusted Risk Estimates (95%CI)** | **Crude Risk Estimates (95%CI)** | **Treatment**  **comparison** | **Adjusting variables**  **(other than age & sex)** |
| Li D 86,  2009 (USA) | Hospital-based  retrospective  case-control | incidence | Cases: 255  Controls: 106 | Pancreas: 0.38 (0.22–0.69) | Calculated from raw data:  0.37 (0.22-0.60) | metformin users vs. nonusers | race, smoking, alcohol, BMI,  family history of cancer, duration of diabetes, and insulin use. |
| Libby G 54,  2009 (Scotland, UK) | Population-based retrospective cohort | incidence & mortality | Cases: 771  At risk: 8.170 | Any site incidence:  0.63 (0.53-0.75);  **Breast: 0.60 (0.32–1.10);**  Colon: 0.60 (0.38-0.94);  Lung: 0.70 (0.43-1.15)  Any site mortality:  0.63 (0.49-0.81) | Any site incidence:  0.46 (0.40–0.53);  **Breast: 0.44 (0.26–0.73);**  Colon: 0.41 (0.28–0.61);  Lung: 0.49 (0.32–0.74);  Any site mortality:  0.48 (0.39–0.60) | metformin users vs. nonusers | Smoking, BMI, HbA1c, material deprivation, other drug use (sulphonylureas or insulin) |
| Wright JL 79,  2009 (USA) | Population-based  retrospective  case-control | incidence | Cases: 97 Controls: 101 | Prostate: 0.56 (0.32-1.00) | Age adjusted:  0.61 (0.37–1.02) | metformin users vs. nonusers | BMI, statin and aspirin use, other diabetes treatment, PSA screening history, family history of PCa |
| Bodmer M 73,  2010 (UK) | General practice  retrospective nested case-control | incidence | Cases: 17 Controls: 120 | **Breast: 0.44 (0.24-0.82)** | **0.55 (0.31-0.97)** | users of 40+ prescriptions (>5 years) of metformin vs. nonusers# | General practice and calendar time by matching, other use of prandial glucose regulators, acarbose, estrogens, smoking, BMI, diabetes duration and HbA1c |
| Landman GWD 70,  2010 (Netherlands) | General practice prospective  cohort | mortality | Cases: 122  At risk: 1.353 | Any site: 0.43 (0.23-0.80) | 0.54 (0.32–0.91) | metformin users vs. nonusers | Smoking, diabetes duration, HbA1c, serum creatinine, BMI, blood pressure, total cholesterol/HDL, albuminuria, insulin use, sulphonylurea use and macrovascular complications |
| Azoulay L 77,  2011 (Canada) | Population-based retrospective nested case-control | incidence | Cases: 739  Controls: 7.359 | Prostate: 1.23 (0.99-1.52) | Calculated from raw data:  1.07 (0.90-1.27) | ever vs. never users of metformin# | HbA1c, alcohol use, obesity, smoking, lower urinary tract symptoms, previous cancer, previous use of NSAID, antihypertensive drugs, and statins, use of other antidiabetic agents |
| Bosco JLF 74,  2011 (Denmark) | Population-based retrospective nested case-control | incidence | Cases: 393  Controls: 3.930 | **Breast: 0.81 (0.63-0.96)** | **0.77 (0.61–0.99)** | metformin for at least 1 yr vs. women not prescribed antidiabetic medication, or used metformin for at least 1 yr. | diabetes complications, clinical obesity  year of birth, parity, postmenopausal hormone use. |
| Bo S 68,  2012 (Italy) | Hospital-based retrospective cohort | mortality | Cases: 122  At risk: 3.703 | Any site: 0.56 (0.34-0.94) | 0.34 0.21–0.54 | metformin use vs. diet control only | diabetes duration, HbA1c, smoking, BMI, presence of retinopathy, nephropathy, coronary or peripheral artery disease, other co-morbidities and the use of antihypertensive drugs and acetylsalicylic acid. |
| Bodmer M 83,  2012 (UK) | General-practice retrospective nested case-control | incidence | Cases: 920  Controls: 5.519 | Colon: 1.43 (1.08-1.90) | 1.29 (1.01–1.65) | metformin users (50+ prescriptions) vs. non users | Diabetes duration, BMI, smoking, prior use of aspirin, NSAID, statins, estrogen use (women), sulphonylureas and insulin use |
| Bodmer M 88,  2012 (UK) | General-practice retrospective  case-control | incidence | Cases: 1.029 Controls: 6.174 | Lung: 1.09 (0.85-1.38) | 1.07 (0.87–1.31) | metformin users (40+ prescriptions) vs. non users | BMI and smoking |
| Redaniel MT 90,  2012 (UK) | General practice retrospective cohort | incidence | Cases: 873  At risk: 52657 | **Breast: 1.02 (0.79-1.3)** | **0.92 (0.73–1.16)** | metformin vs. sulfonylurea | period, region, BMI, year of diagnosis. |
| Becker C 96,  2013 (UK) | General practice retrospective  case-control | incidence | Cases: 291  Controls: 1.746 | Endometrial: 0.88 (0.58–1.32) | Calculated from raw data:  1.01 (0.74-1.37) | metformin users (25+ prescriptions) vs. no prior use | BMI, smoking, diabetes duration |
| %CI- Percent Confidence Interval, UKPDS- United Kingdom Prospective Diabetes Study, RCT- Randomized Controlled Trial, N- number, BMI- Body Mass Index, NSAID- Non-steroidal Anti-inflammatory drug, CDS- chronic disease score, HbA1c - haemoglobin A1c, HBV- Hepatitis B Virus, HCV- Hepatitis C Virus, DVT- Deep Vein Thrombosis, HDL- High Density Lipoprotein, PSA- Prostate specific antigen, PCa- Prostate Cancer, ADOPT- A Diabetes Outcome Progression Trial, RECORD- Rosiglitazone Evaluated for Cardiac Outcomes and Regulation of Glycaemia in Diabetes, SBP- systolic blood pressure, LDL-C- low density lipoprotein cholesterol, RAS- renin–angiotensin system, OGLD- oral glucose lowering drugs; ǂ risk estimate for users of metformin alone; *  ADOPT-G and ADOPT-R, glibenclamide and rosiglitazone arms of ADOPT study. Risk estimates represent multiple comparisons from a single trial, and the analysis takes account of correlation between these comparisons; risk estimates for single cancer sites were calculated from crude data; #Excluded patients on monotherapy with insulin. | | | | | | | |
